## THE FUNCTIONING OF THE HAEMOCYANIN OF THE TERRESTRIAL CHRISTMAS ISLAND RED CRAB *GECARCOIDEA NATALIS* AND ROLES FOR ORGANIC MODULATORS

AGNIESZKA M. ADAMCZEWSKA\* AND STEPHEN MORRIS

*School of Biological Sciences (A08), University of Sydney, Sydney, NSW 2006, Australia*

\*Present address: Oregon Institute of Marine Biology, University of Oregon, PO Box 5389, Charleston, OR 97420, USA  
(e-mail: ishka@oimb.uoregon.edu)

*Accepted 24 August; published on WWW 10 November 1998*

### Summary

*Gecarcoidea natalis* is a land crab that migrates annually several kilometres to breed. The O<sub>2</sub>-binding properties of haemocyanin in *G. natalis* were investigated *in vitro* to test the idea that the O<sub>2</sub>-binding properties of the haemocyanin of land crabs are not dependent on circulating modulators and to provide a model of haemocyanin functioning during exercise. The affinity of the haemocyanin for O<sub>2</sub> decreased with increasing temperature (change in the heat of oxygenation;  $\Delta H = -59 \text{ kJ mol}^{-1}$ ). The haemocyanin of *G. natalis* apparently differs from that of other terrestrial crabs in showing haemocyanin O<sub>2</sub> modulation by both organic and inorganic molecules. Haemocyanin O<sub>2</sub>-affinity was not affected by Mg<sup>2+</sup> but was sensitive to changes in Ca<sup>2+</sup> concentration ( $\Delta \log P_{50} / \Delta \log [\text{Ca}] = -0.61$ , where  $P_{50}$  is the partial pressure of O<sub>2</sub> required for half-maximal O<sub>2</sub> binding). The Bohr factor was modest ( $\phi = -0.26 \pm 0.03$ ,  $N = 4$ , in whole haemolymph at 25 °C) and there was no specific effect of CO<sub>2</sub> on the O<sub>2</sub>-binding properties of the haemocyanin. An increase in urate concentration increased haemocyanin O<sub>2</sub>-affinity, but the effect was linear ( $\Delta \log P_{50} / \Delta [\text{urate}] = -0.06$ ) and not logarithmic as is the case in other species. The effect of L-lactate on the haemocyanin

O<sub>2</sub>-affinity in *G. natalis* was unique among the crustaceans, because an increase in L-lactate concentration decreased the haemocyanin O<sub>2</sub>-affinity. The effect of L-lactate on haemocyanin O<sub>2</sub>-affinity ( $\Delta \log P_{50} / \Delta \log [\text{lactate}]$ ) was time-dependent and decreased from a maximum of 0.044 on day 1 to 0.001 after 4 days of storage at 4 °C. The presence of an unknown dialysable and unstable factor in the haemolymph is postulated to explain the time-dependent effect of L-lactate on haemocyanin O<sub>2</sub>-binding properties. Model oxygen equilibrium curves constructed for *in vivo* conditions showed that the reverse effect of L-lactate was advantageous by decreasing the O<sub>2</sub>-affinity of the haemocyanin beyond that predicted by the Bohr shift alone and assisted in O<sub>2</sub> off-loading at the tissues. This effect of lactate can only provide an advantage if the gas-exchange organs maintain arterial O<sub>2</sub> loading and thus is dependent on lung function in land crabs and must have occurred coincident with the evolution of these other features.

Key words: *Gecarcoidea natalis*, Christmas Island red crab, haemocyanin, modulation, oxygen transport.

### Introduction

The major respiratory pigment in the haemolymph of decapod crustaceans is the copper-based protein haemocyanin. Haemocyanin markedly increases the O<sub>2</sub>-carrying capacity of the haemolymph and is now appreciated to be under the control of a complex suite of effectors and organic modulators that regulate O<sub>2</sub>-binding by haemocyanin (for reviews, see Mangum, 1983; Morris, 1990, 1991; Burnett, 1992; Truchot, 1992; Morris and Bridges, 1994). Thus, haemocyanin functioning is apparently controlled in a manner analogous to vertebrate haemoglobin O<sub>2</sub>-binding. A significant role for haemocyanin in O<sub>2</sub> transport in quiescent crabs has been questioned, and the involvement of haemocyanin in O<sub>2</sub> transport varies among species. The importance of O<sub>2</sub> delivery by haemocyanin increases in response to increased O<sub>2</sub> demand and during environmental hypoxia (e.g. McMahon *et al.* 1979;

Greenaway *et al.* 1988; Lallier and Truchot, 1989; Morris *et al.* 1996b).

Recently, a dichotomy in the functioning of haemocyanin in terrestrial and aquatic decapod crustaceans has become apparent: terrestrial decapods appear to have haemocyanin with little or no sensitivity to most modulators. In some cases, this appears to be due to specific blocking of binding sites by dialysable compounds (e.g. Morris *et al.* 1988) and in others to an absence of binding (Morris and Bridges, 1994). The haemocyanins of terrestrial crustaceans tend to become readily saturated with O<sub>2</sub> at the gas-exchange surfaces, despite a haemolymph acidosis, partly as a result of the efficiency of the gas-exchange organs (e.g. Wood and Randall, 1981; Greenaway *et al.* 1988; Adamczevska and Morris, 1994a, 1998). In addition, the lower viscosity of air, compared with

water, coupled to the relatively greater abundance of O<sub>2</sub> over CO<sub>2</sub> in air compared with water allows, a relative hypoventilation in air-breathers and reduces the costs of O<sub>2</sub> extraction from air. Consequently, the need for modulators to increase haemocyanin O<sub>2</sub>-affinity in terrestrial crabs appears to be largely redundant (Morris, 1990). Instead, terrestrial crustaceans appear to rely on altering ventilation and circulation rates to maintain O<sub>2</sub> delivery by haemocyanin (Morris, 1991; Morris and Bridges, 1994). Haemocyanin is also the main protein in the haemolymph of crustaceans (Chen and Cheng, 1993), and higher concentrations of haemocyanin in terrestrial compared with aquatic species are thought to provide increased buffering for the higher P<sub>CO<sub>2</sub></sub> and consequent CO<sub>2</sub> content in air-breathers (for reviews, see Mangum, 1983; Morris and Bridges, 1994).

The ability to increase the rate and capacity of O<sub>2</sub> delivery is essential if the increased metabolic rate is to be supported aerobically and, thereby, to increase the scope for activity. While increased activity can also be supported by anaerobic metabolism, anaerobiosis is very inefficient compared with aerobiosis and results in acidosis and an O<sub>2</sub> debt that must be repaid later (Herreid and Full, 1988).

The affinity of haemocyanin for O<sub>2</sub> can be affected by temperature, pH and salinity (for a review, see Truchot, 1992) as well as by neurohormones (Morris and McMahon, 1989; McMahon and Morris, 1990), L-lactate, urate (Truchot, 1980; Morris *et al.* 1985a) and various inorganic molecules (Mangum, 1983; McMahon, 1986; Morris, 1990, 1991). Changes in the O<sub>2</sub>-affinity of respiratory pigments in response to temperature and salinity represent perturbing effects rather than regulatory mechanisms (Jokumsen and Weber, 1982; Morris, 1991; Lallier and Truchot, 1997). In contrast, L-lactate, urate and Ca<sup>2+</sup> are thought to modulate haemocyanin O<sub>2</sub>-affinity to optimise O<sub>2</sub> delivery to the tissues during exercise or environmental hypoxia (for a review, see McMahon, 1985; Morris, 1990; Burnett, 1992; Truchot, 1992). For example, anaerobiosis in crustaceans generates L-lactate, and the concomitant acidosis results in decreased haemocyanin O<sub>2</sub>-affinity. In many aquatic crustaceans, L-lactate can partially offset the Bohr shift, thereby assisting O<sub>2</sub> uptake at the gas-exchange surfaces by increasing the O<sub>2</sub>-affinity of haemocyanin (Booth *et al.* 1982; Morris *et al.* 1986a,b; McMahon, 1985; Morris, 1990). It is these organic modulator effects that seem to be specifically absent in land crabs.

The condition of greatest potential demand on haemocyanin functioning is likely to be either during moderate environmental hypoxia or during exercise at close to the maximum aerobic speed or during repeated sprinting. Thus, functionally important modulations of O<sub>2</sub>-binding by haemocyanin in terrestrial crabs might be most important during exercise since they rarely encounter environmental hypoxia.

The Christmas Island red crab *Gecarcoidea natalis* provides a model to assess haemocyanin function in land crabs since, with the exception of a 3 week larval phase, it is completely terrestrial. In addition, these red crabs undertake an annual

breeding migration during which they may walk distances of 1 km per day for a number of consecutive days. Importantly, this species does not exhibit exceptional aerobic capacity (ability to increase exercise intensity) compared with that of other crustaceans, and O<sub>2</sub> shortage at the tissue level during exercise results in anaerobiosis (Adamczewska and Morris, 1998). A characterisation of O<sub>2</sub> binding by the haemocyanin of *G. natalis* was carried out to determine the response to any effectors of haemocyanin O<sub>2</sub>-affinity. This characterisation of the haemocyanin O<sub>2</sub>-affinity and the sensitivity of O<sub>2</sub>-binding to haemocyanin to modulators *in vitro* was used, together with *in vivo* data (Adamczewska and Morris, 1998), to model the functioning of the pigment *in vivo* in exercising *G. natalis*. The models of haemocyanin O<sub>2</sub>-function could then be used to assess whether anaerobiosis during exercise occurs as a result of insufficient O<sub>2</sub> delivery to the tissues or whether it is due to other limitations, such as the aerobic capacity of the tissues.

## Materials and methods

### *Construction of oxygen equilibrium curves in vitro*

Red crabs *Gecarcoidea natalis* (Pocock) with a body mass ranging from 114 to 232 g (190±6 g; mean ± S.E.M., N=50) were collected from Christmas Island and maintained in the laboratory as described previously (Adamczewska and Morris, 1994a). To determine the functioning of the haemocyanin of *G. natalis* in oxygen transport, *in vitro* oxygen equilibrium curves were constructed using a spectrophotometric diffusion chamber method (Sick and Gersonde, 1969; Morris *et al.* 1985b). Samples of venous haemolymph were obtained by sampling *via* the arthroal membrane at the base of the last walking leg. In the diffusion chamber, a subsample of haemolymph (15 µl) was deoxygenated with CO<sub>2</sub>/N<sub>2</sub> mixtures (Wösthoff gas-mixing pumps), and the change in absorbance was determined after stepwise addition of O<sub>2</sub>. Changes in absorption at 335 nm were proportional to the O<sub>2</sub> saturation of the haemocyanin. The pH of the haemolymph was controlled by changing the proportion of CO<sub>2</sub> (0.1–3.6%) to span the pH range measured *in vivo*. The pH of the haemolymph was measured near the P<sub>50</sub> (the partial pressure of O<sub>2</sub> at which the haemocyanin is 50% saturated) with a capillary electrode (G299a, Radiometer) housed in a BMS2 (Blood Micro System) and thermostatted at the experimental temperature of 25±0.1 °C, unless otherwise specified.

Haemolymph from at least eight red crabs was pooled to produce each 'batch' of haemolymph used for the construction of oxygen equilibrium curves (OECs). Because of the number and duration of treatments, it was necessary to use several different batches of haemolymph. The effects of all treatments on the O<sub>2</sub>-binding properties of a batch of haemolymph were compared with the O<sub>2</sub>-binding properties of that batch of whole haemolymph. All OECs were constructed using fresh haemolymph refrigerated at 4 °C or held on ice. The individual crabs used for haemolymph sampling were different for each batch of haemolymph. At the end of a series of determinations, and for each batch of haemolymph, the haemocyanin O<sub>2</sub>-

affinity was checked to ensure that the haemolymph had not deteriorated.

#### *Effect of temperature*

The effects of temperature on haemocyanin O<sub>2</sub>-affinity and the cooperativity of O<sub>2</sub>-binding in whole haemolymph were determined at 5 °C intervals over the range 15–35 °C. The change in heat of oxygenation ( $\Delta H$ ; kJ mol<sup>-1</sup>) was calculated as:

$$\Delta H = -2.303R \frac{\Delta \log P_{50}}{(1/T_1) - (1/T_2)},$$

where  $R$  is the gas constant (in kJ) and  $T$  is temperature (in K).

#### *Effect of metabolites*

The concentrations of L-lactate and urate in the haemolymph were manipulated to determine their effect on the haemocyanin O<sub>2</sub>-affinity and binding cooperativity at 25±0.1 °C. A 500 µl sample of haemolymph was enriched with uric acid by equilibration with 4 mg of uric acid (Sigma, no. U-2625) overnight. The haemolymph was then centrifuged for 10 min at 10 000 *g* to precipitate any excess solid urate. Haemolymph enriched with urate was then diluted with the original whole haemolymph to obtain different concentrations of uric acid. The use of uric acid resulted in slight acidification of the haemolymph samples (see Results), but sodium urate did not appear to bind to the haemocyanin since it was not possible to increase the urate concentration in the haemolymph using the sodium salt. Urate concentrations in the haemolymph were determined using a Sigma Diagnostics test kit (no. 685).

The effect of L-lactate was investigated using four separate batches of haemolymph, each taken from a different group of eight red crabs, which had been collected from Christmas Island on one of two different occasions. The L-lactate concentration in whole haemolymph withdrawn from the crabs was always less than 1 mmol l<sup>-1</sup>; in haemolymph enriched with L-lactate, the concentration of L-lactate ranged from 12.3 to 26.5 mmol l<sup>-1</sup> (see Table 1). To determine the effect of L-lactate, haemolymph was enriched with L-lactate by the ultracentrifugation and replacement method (Bridges and Morris, 1986). Briefly, in the morning of the day of construction of the OEC, a sample of whole haemolymph (300 µl) was centrifuged (Air-Fuge, Beckman, USA) for 20 min at 160 000 *g* to pellet the haemocyanin. A proportion (10%) of the plasma solution was removed and replaced with an equal volume of concentrated L-lactate (Sigma, no. L-2250 lithium lactate) solution in *G. natalis* Ringer, consisting of (in mmol l<sup>-1</sup>): NaCl, 335; KCl, 8.5; MgSO<sub>4</sub>, 1; MgCl<sub>2</sub>, 10.4; CaCl<sub>2</sub>, 17.5; and NaHCO<sub>3</sub>, 1. The salt concentrations of the Ringer's solution were based on the measured salt concentration in the pooled whole haemolymph sample (see below). The sample was remixed and used for OEC determination. The concentration of L-lactate in each sample was determined using a Boehringer Mannheim test kit (no. 138

084). Control OECs were constructed on a different pooled haemolymph sample containing 20 mmol l<sup>-1</sup> LiCl.

The combined effect of L-lactate and urate on the haemocyanin O<sub>2</sub>-affinity was also examined. A series of OECs was constructed using haemolymph enriched with three different concentrations of uric acid and containing 21 mmol l<sup>-1</sup> L-lactate.

#### *Effect of dialysis and divalent cations*

Haemolymph samples (400 µl) were dialysed for 20 h at 4 °C in two washings, each consisting of 2 l of *G. natalis* Ringer's solution at pH 8.1. The effects of Mg<sup>2+</sup> and Ca<sup>2+</sup> on the haemocyanin O<sub>2</sub>-binding properties were investigated by dialysing haemolymph in Ringer's solutions containing three different concentrations of Mg (5.2, 10.4 and 16 mmol l<sup>-1</sup>) and Ca (10, 17.5 and 24 mmol l<sup>-1</sup>). The concentrations in the dialysed haemolymph were determined as total elemental concentration by the Atomic Adsorption Spectrophotometer (AAS) (GBC 906). To suppress interference, determinations of Na and K were made in the presence of 5.9 mmol l<sup>-1</sup> CsCl<sub>2</sub> and of Mg and Ca in the presence of 7.2 mmol l<sup>-1</sup> LaCl<sub>3</sub>.

Separate haemolymph samples were similarly dialysed but in *G. natalis* Ringer's solution containing sufficient L-lactate to raise the concentration in the sample to 21 mmol l<sup>-1</sup>. Some of these samples were further manipulated to alter the urate concentration (see above) so as to produce dialysed haemolymph containing 21 mmol l<sup>-1</sup> and a range of urate concentrations. The maximum concentrations of L-lactate used were well within the physiological range for *G. natalis* which, during intensive exercise, may have haemolymph levels in excess of 30 mmol l<sup>-1</sup> (Adamczewska and Morris, 1994b). The upper limit for the urate concentration used was determined by the maximum carrying capacity of the haemolymph and thus the maximum effect achievable.

#### *Specific effect of CO<sub>2</sub>*

The specific effect of CO<sub>2</sub> on haemocyanin O<sub>2</sub>-binding was determined by manipulating haemolymph pH by the addition of either 0.01 mol l<sup>-1</sup> of HCl-enriched or 0.01 mol l<sup>-1</sup> NaOH-enriched Ringer's solution to induce a 'fixed acid' Bohr shift rather than a CO<sub>2</sub> Bohr shift. A subsample of haemolymph (150 µl) was ultracentrifuged for 20 min at 160 000 *g* to sediment the haemocyanin (Beckman, Air-Fuge) and 40 µl of the plasma was removed. The plasma was then mixed with different volumes (range 10–40 µl) of the acidic or basic red crab Ringer's solution, and 40 µl of this mixture was returned to the haemolymph, and the haemocyanin was resuspended (Bridges and Morris, 1986). The OECs were constructed at constant CO<sub>2</sub> levels of either 0.4% or 4% CO<sub>2</sub>. Analysis of covariance (ANCOVA) was used to test for heterogeneity in the variances (slopes) between the data sets to determine the dependence of log *P*<sub>50</sub> on pH. For data sets with homogeneous variances, the elevations of the regression lines were compared to determine whether changes in haemocyanin O<sub>2</sub>-affinity had occurred. The significance level of *P*=0.05 was applied to all the resulting *F* values. Values are presented as means ± S.E.M.

### Results

For each OEC, the  $P_{50}$  at the physiological pH of 7.6 was calculated from the regression equations describing the dependence of  $\log P_{50}$  on pH and used for comparisons among treatments. The  $P_{50}$  and cooperativity of O<sub>2</sub>-binding ( $n_{50}$ ) were calculated using saturation values between 25% and 75%.

#### Effect of temperature on haemocyanin O<sub>2</sub>-affinity and binding cooperativity

The affinity of red crab haemocyanin for oxygen was clearly dependent on temperature (Fig. 1A). The ANCOVA showed that the dependence of  $\log P_{50}$  on pH (Bohr factor) was the same for haemocyanin at 20, 25 and 35 °C (i.e. homogeneous variances) and that the reduction in haemocyanin O<sub>2</sub>-affinity induced by increased temperature was statistically significant (significant change in elevation of slopes). The affinity of haemocyanin for O<sub>2</sub> across the range 15–35 °C decreased from a  $P_{50}$  of 0.80 kPa to 3.31 kPa at pH 7.6 (Fig. 1A). The haemocyanin sensitivity to temperature was lowest in the range 30–35 °C ( $\Delta H = -31.9 \text{ kJ mol}^{-1}$ ) and highest between 15 and 20 °C ( $\Delta H = -62.2 \text{ kJ mol}^{-1}$ ), with an overall  $\Delta H$  of  $-59.0 \text{ kJ mol}^{-1}$  over the temperature range examined (15–35 °C). The magnitude of the Bohr shift ( $\phi = \Delta \log P_{50} / \Delta \text{pH}$ )

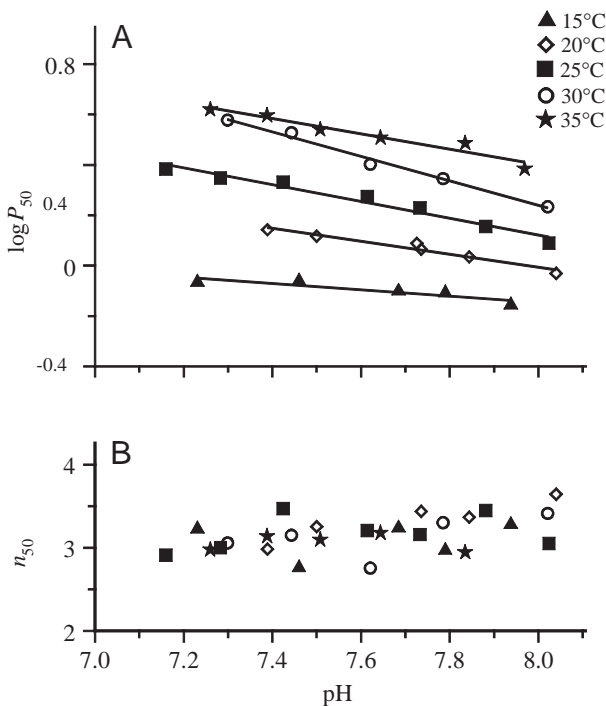

Fig. 1 (A) The haemocyanin O<sub>2</sub>-affinity of *Gecarcoidea natalis* and the relationship between  $\log P_{50}$  (measured as kPa) and pH at different temperatures: 15 °C,  $\log P_{50} = 0.853 - 0.125 \text{pH}$  ( $r^2 = 0.819$ ); 20 °C,  $\log P_{50} = 2.061 - 0.258 \text{pH}$  ( $r^2 = 0.953$ ); 25 °C,  $\log P_{50} = 2.794 - 0.334 \text{pH}$  ( $r^2 = 0.967$ ); 30 °C,  $\log P_{50} = 4.139 - 0.487 \text{pH}$  ( $r^2 = 0.990$ ); 35 °C,  $\log P_{50} = 2.841 - 0.305 \text{pH}$  ( $r^2 = 0.939$ ). (B) The cooperativity of O<sub>2</sub>-binding ( $n_{50}$ ) by haemocyanin in the temperature range 15–35 °C over a range of pH.

was lowest at the lowest temperature of 15 °C ( $\phi = -0.13$ ) but increased to a maximum at 30 °C ( $\phi = -0.49$ ) (Fig. 1A). The cooperativity of haemocyanin O<sub>2</sub>-binding ( $n_{50} = 3.16 \pm 0.07$ ,  $N = 27$ ) of the red crab haemocyanin was not dependent on either pH or temperature (Fig. 1B).

#### The specific effect of CO<sub>2</sub>: fixed-acid Bohr shift

There was clearly no difference between the 'fixed acid' and CO<sub>2</sub> Bohr shifts, and ANCOVA did not reveal any specific effect of CO<sub>2</sub> on haemocyanin O<sub>2</sub>-affinity. The relationship between  $\log P_{50}$  (measured in kPa) and pH could be described by a common equation for both 0.4 and 4.0% CO<sub>2</sub>:  $\log P_{50} = 2.03 - 0.235 \text{pH}$  ( $r^2 = 0.943$ ). Similarly, there was no obvious difference between haemocyanin O<sub>2</sub>-binding cooperativity at 0.4% or 4% CO<sub>2</sub>, with a mean  $n_{50}$  of  $3.13 \pm 0.06$  ( $N = 19$ ).

#### The effect of Mg<sup>2+</sup> and Ca<sup>2+</sup> on haemocyanin O<sub>2</sub>-binding properties

Haemolymph dialysed against three concentrations of Mg showed no change in either affinity or cooperativity of haemocyanin O<sub>2</sub>-binding. The relationship between  $\log P_{50}$  (measured in kPa) and pH could be described by a common

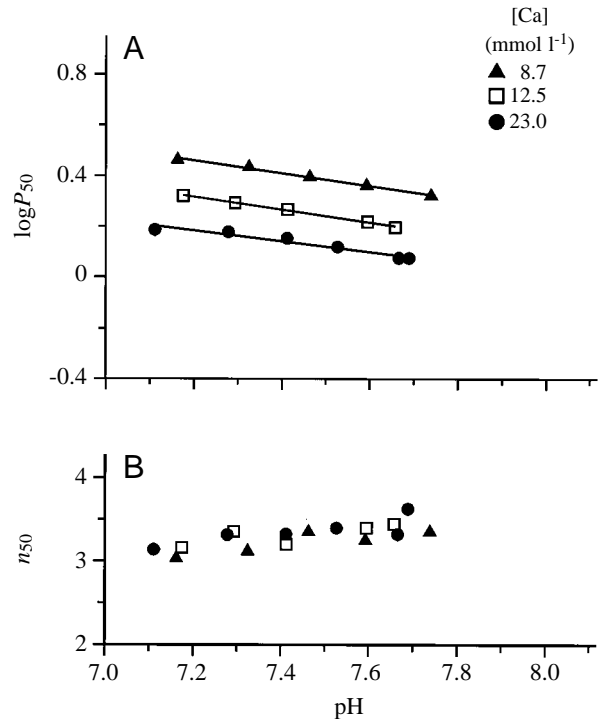

Fig. 2. (A) The effect of Ca concentration on the haemocyanin O<sub>2</sub>-binding properties of *Gecarcoidea natalis*. The following equations describe the dependency of haemocyanin O<sub>2</sub>-affinity ( $P_{50}$  measured as kPa) on pH at different concentrations of Ca: at 8.7 mmol l<sup>-1</sup> Ca,  $\log P_{50} = 2.251 - 0.249 \text{pH}$  ( $r^2 = 0.993$ ); at 12.5 mmol l<sup>-1</sup> Ca,  $\log P_{50} = 2.140 - 0.253 \text{pH}$  ( $r^2 = 0.996$ ); at 23 mmol l<sup>-1</sup> Ca,  $\log P_{50} = 1.71 - 0.212 \text{pH}$  ( $r^2 = 0.942$ ). (B) Oxygen-binding cooperativity ( $n_{50}$ ) of the haemocyanin for the different Ca concentrations within the physiological pH range.

equation for Mg concentrations between 6.1 and 19.7 mmol l<sup>-1</sup>:  $\log P_{50} = 1.892 - 0.220\text{pH}$  ( $r^2 = 0.946$ ) with a mean  $n_{50}$  of  $3.32 \pm 0.04$  ( $N = 15$ ). In contrast, dialysing haemolymph against increasing concentrations of Ca resulted in a progressive increase in the haemocyanin O<sub>2</sub>-affinity (Fig. 2A). An increase in Ca concentration from 8.7 to 23 mmol l<sup>-1</sup> resulted in a decrease in  $P_{50}$  at pH 7.6 from 2.29 to 1.26 kPa. The change in the affinity of haemocyanin for O<sub>2</sub> at different concentrations of Ca could be described by the following equation:  $\log P_{50} = -0.61\log[\text{Ca}] + 0.91$  ( $r^2 = 0.958$ ) (Fig. 2A). The Bohr factor remained similar at all concentrations of Ca used (mean  $\phi = -0.24 \pm 0.02$ ,  $N = 3$ ). Similarly, the  $n_{50}$  value of  $3.30 \pm 0.04$  ( $N = 16$ ) was not dependent on either Ca concentration or pH (Fig. 2B).

#### The effect of urate

Increased concentrations of urate did not alter the mean Bohr shift of whole haemolymph ( $\phi = -0.26 \pm 0.03$ ,  $N = 4$  at 25 °C) but did produce a progressive increase in haemocyanin O<sub>2</sub>-affinity (Fig. 3A). At pH 7.6,  $P_{50}$  decreased from 1.82 kPa at 0.08 mmol l<sup>-1</sup> uric acid to 1.00 kPa in the presence of 4.32 mmol l<sup>-1</sup> uric acid (Fig. 3A). Interestingly, the haemocyanin O<sub>2</sub>-affinity changed linearly with increasing [urate] rather than as  $\log[\text{urate}]$  as described for other

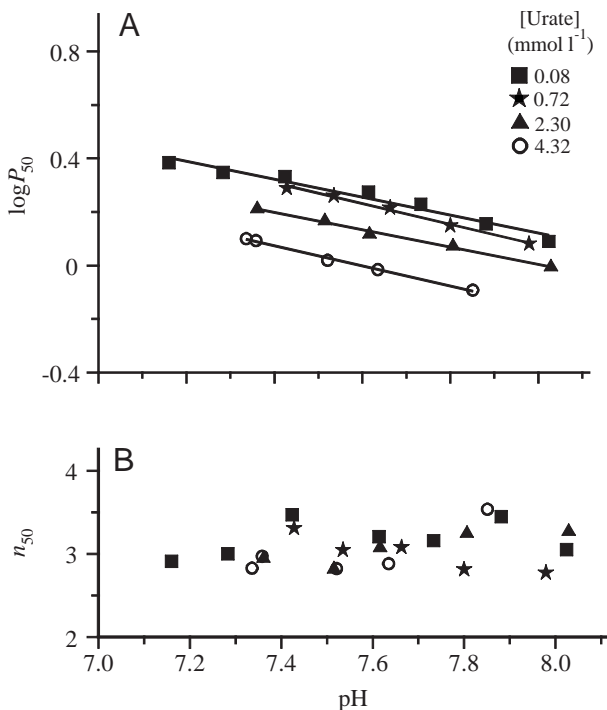

Fig. 3. (A) The effect of urate on haemocyanin O<sub>2</sub>-affinity in whole haemolymph of *Gecarcoidea natalis*. The relationships between  $\log P_{50}$  (measured as kPa) and pH at different urate concentrations are as follows: at 0.08 mmol l<sup>-1</sup> urate,  $\log P_{50} = 2.794 - 0.334\text{pH}$  ( $r^2 = 0.967$ ); at 0.72 mmol l<sup>-1</sup> urate,  $\log P_{50} = 3.180 - 0.388\text{pH}$  ( $r^2 = 0.993$ ); at 2.3 mmol l<sup>-1</sup> urate,  $\log P_{50} = 2.59 - 0.324\text{pH}$  ( $r^2 = 0.994$ ); at 4.4 mmol l<sup>-1</sup> urate,  $\log P_{50} = 2.85 - 0.375\text{pH}$  ( $r^2 = 0.996$ ). (B) The oxygen-binding cooperativity ( $n_{50}$ ) of haemocyanin at different urate concentrations.

haemocyanins (Morris, 1991). Therefore, the effect of urate on the affinity of haemocyanin for O<sub>2</sub> at pH 7.6 could be quantified by the following relationship:  $\log P_{50} = 0.267 - 0.060[\text{urate}]$  ( $r^2 = 0.997$ ). The cooperativity of haemocyanin O<sub>2</sub>-binding, mean  $n_{50} = 3.08 \pm 0.05$  ( $N = 23$ ), was not affected by different urate concentrations (Fig. 3B).

#### The combined effect of urate and L-lactate enrichment on whole haemolymph

In the presence of 21 mmol l<sup>-1</sup> L-lactate, increasing the amount of urate in the haemolymph from 0.08 to 3.8 mmol l<sup>-1</sup> influenced both the affinity of haemocyanin for O<sub>2</sub> and the Bohr effect (Fig. 4A). However, there was no clear relationship between the Bohr effect and the concentration of urate:  $\phi$  varied between -0.47 and -0.27. In the presence of 21 mmol l<sup>-1</sup> L-lactate, increasing the urate concentration increased the affinity of haemocyanin for O<sub>2</sub> (Fig. 4A) from a  $P_{50}$  (at pH 7.6) of 1.82 kPa at 0.08 mmol l<sup>-1</sup> uric acid to a  $P_{50}$  of 1.23 kPa (at pH 7.6) at 3.8 mmol l<sup>-1</sup> uric acid. The dependence of haemocyanin O<sub>2</sub>-affinity on urate

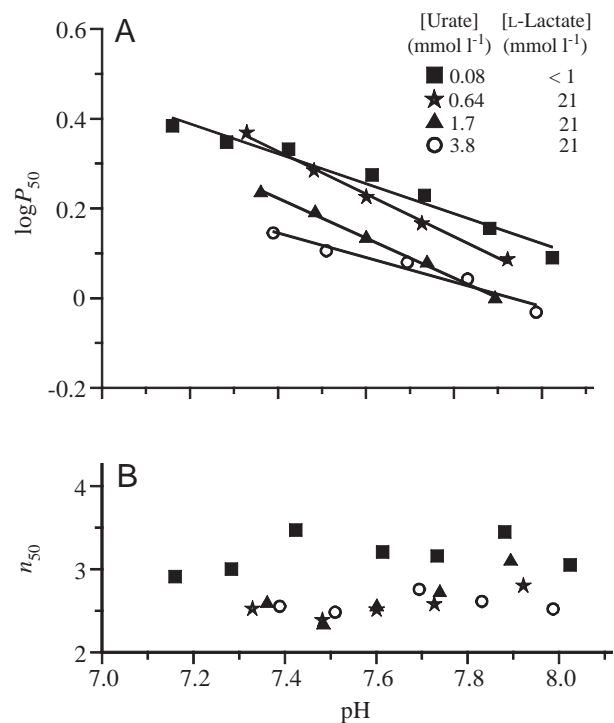

Fig. 4. (A) The haemocyanin affinity for O<sub>2</sub> in whole haemolymph enriched with both L-lactate (21 mmol l<sup>-1</sup>) and different concentrations of urate and compared with whole haemolymph (filled squares, [urate] 0.08 mmol l<sup>-1</sup>, [lactate] <1 mmol l<sup>-1</sup>). The regression equations describing the relationship between  $\log P_{50}$  (measured as kPa) and pH are: at 0.08 mmol l<sup>-1</sup> urate,  $\log P_{50} = 2.794 - 0.334\text{pH}$  ( $r^2 = 0.967$ ); at 0.64 mmol l<sup>-1</sup> urate,  $\log P_{50} = 3.843 - 0.475\text{pH}$  ( $r^2 = 0.996$ ); at 1.7 mmol l<sup>-1</sup> urate,  $\log P_{50} = 3.501 - 0.444\text{pH}$  ( $r^2 = 0.997$ ); at 3.8 mmol l<sup>-1</sup> urate,  $\log P_{50} = 2.166 - 0.273\text{pH}$  ( $r^2 = 0.955$ ). (B) The binding cooperativity ( $n_{50}$ ) of haemocyanin in the presence of 21 mmol l<sup>-1</sup> L-lactate and varying concentrations of urate compared with that of whole haemolymph (filled squares).

concentration in the presence of  $21 \text{ mmol l}^{-1}$  L-lactate could be described by the following equation:  $\log P_{50} = 0.248 - 0.045[\text{urate}]$  ( $r^2 = 0.898$ ).

While high concentrations of either L-lactate (see below) or urate had no effect on the cooperativity of  $\text{O}_2$ -binding by haemocyanin, the combined effect of  $21 \text{ mmol l}^{-1}$  L-lactate and urate in whole haemolymph resulted in a significant decrease in the mean  $\text{O}_2$ -binding cooperativity of the haemocyanin from  $3.18 \pm 0.09$  ( $N=7$ ) to  $2.60 \pm 0.05$  ( $N=5$ ) (Fig. 4B).

#### The effect of L-lactate

The effect of L-lactate on the haemocyanin  $\text{O}_2$ -affinity of *G. natalis* was very unusual: increasing the concentration of L-lactate in the haemolymph resulted in a decrease in the haemocyanin  $\text{O}_2$ -affinity. Furthermore, the magnitude of the effect did not appear to be simply dependent on L-lactate concentration, but rather on the ageing of the haemolymph sample (Fig. 5; Table 1). The decrease in haemocyanin  $\text{O}_2$ -affinity in haemolymph enriched with L-lactate was greater in 'fresh haemolymph' (1 day after sampling) than in aged haemolymph (4–21 days old; Table 1). The  $\text{O}_2$ -affinity of haemocyanin in the presence of  $20 \text{ mmol l}^{-1} \text{ Li}^+$  ( $P_{50} = 1.92 \text{ kPa}$  at pH 7.6) was indistinguishable from that of the original whole haemolymph ( $P_{50} = 1.93 \text{ kPa}$  at pH 7.6).

Haemolymph enriched with L-lactate had a significantly lower haemocyanin  $\text{O}_2$ -affinity than the corresponding whole haemolymph in all cases examined (Table 1; Fig. 5). Haemocyanin  $\text{O}_2$ -affinity in the haemolymph enriched with  $20 \text{ mmol l}^{-1}$  L-lactate determined 1 day after collection was less than that of whole haemolymph (Fig. 5B–D; Table 1): at pH 7.6, the  $P_{50}$  increased by  $0.31 \pm 0.14 \text{ kPa}$  ( $N=3$ ). In contrast, in haemolymph enriched with L-lactate several days after collection, the increase in  $P_{50}$  was only  $0.14 \pm 0.02 \text{ kPa}$  ( $N=4$ ). Thus, the effect of L-lactate on haemocyanin  $\text{O}_2$ -affinity ( $\Delta \log P_{50} / \Delta \log [\text{lactate}]$ ) was time-dependent and decreased from a maximum value of 0.044 on day 1 to 0.001 after 4 days of storage at  $4^\circ\text{C}$ . The range of concentrations of L-lactate in the haemolymph ( $0.1$ – $26.5 \text{ mmol l}^{-1}$ ) did not affect the binding cooperativity of the haemocyanin (mean  $n_{50} = 3.16 \pm 0.02$ ,  $N=67$ ).

Fig. 5. The effect of L-lactate on haemocyanin  $\text{O}_2$ -affinity ( $P_{50}$ , measured as kPa) in whole haemolymph (WH) of *Gecarcoidea natalis*. (A–D) Four separate batches of haemolymph (WH1–WH4) originating from different crabs. The inset in A shows data for a separate pool of whole haemolymph with and without  $20 \text{ mmol l}^{-1}$  LiCl added to control for the  $\text{Li}^+$  counterion of the lactate salt used. Samples of different age enriched with L-lactate were used to construct oxygen equilibrium curves (OECs). The lactate samples (WH enriched with L-lactate at the concentration shown) are identified by age, either 1 day post-sampling (next day) or a number of days later: for WH1, 21 days post-sampling (open circles); for WH3, 9 days post-sampling (open diamonds); and for WH4, 4 days (open diamonds) and 7 days (open circles) post-sampling. WH3 check and WH4 check represent values from OECs of whole haemolymph repeated several days later (see Table 1).

#### Effect of metabolites on haemocyanin $\text{O}_2$ -binding properties in dialysed haemolymph

The Bohr shift of dialysed haemolymph ( $\phi = -0.25$ ) was greater than that of the corresponding whole haemolymph ( $\phi = -0.18$ ; Fig. 6A) but did not differ from the overall mean value ( $\phi = -0.26$ ). However, increasing the L-lactate concentration in the dialysed haemolymph (to  $21 \text{ mmol l}^{-1}$ ) partially reversed this effect ( $\phi = -0.22$ ). Dialysed haemolymph

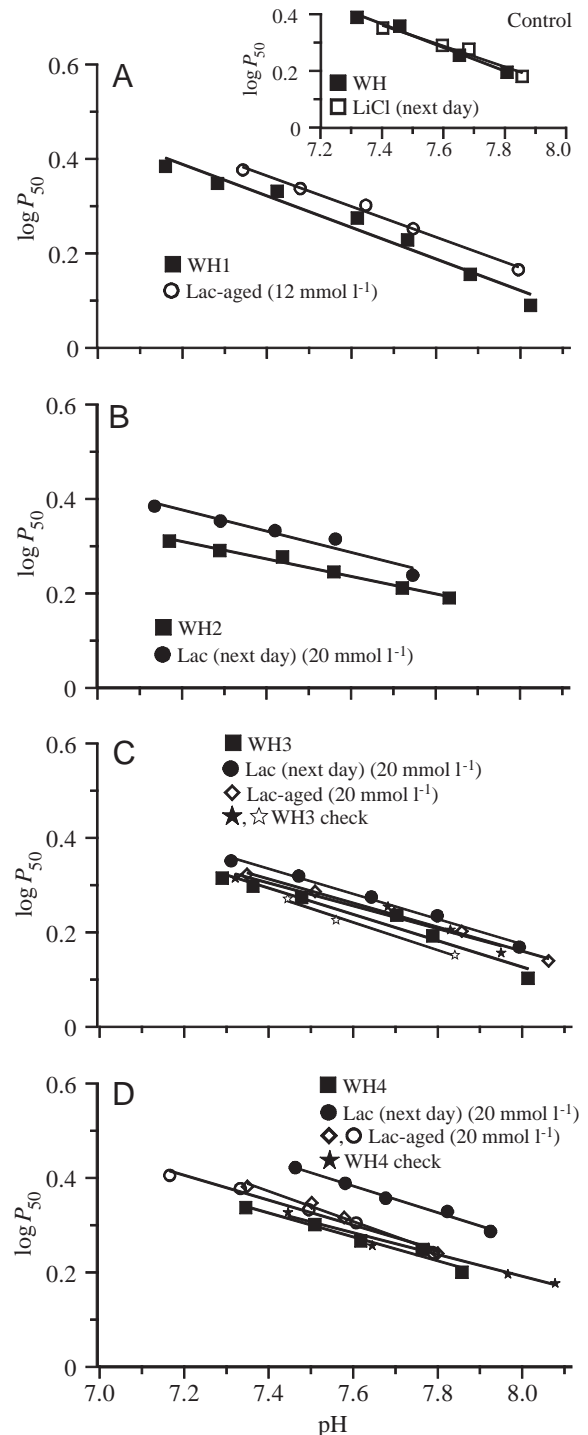

Table 1. The effect of L-lactate on the haemocyanin O<sub>2</sub>-affinity in *Gecarcoidea natalis*

| Sample     | [L-Lactate]<br>(mmol l <sup>-1</sup> ) | Day of OEC<br>construction | $\phi$ | $a$   | $r^2$ | Calculated $P_{50}$<br>(kPa) at pH 7.6 |
|------------|----------------------------------------|----------------------------|--------|-------|-------|----------------------------------------|
| WH 1       | 0.08                                   | 0                          | -0.33  | 2.794 | 0.967 | 1.799                                  |
| Lac        | 12.3                                   | 21                         | -0.33  | 2.767 | 0.99  | 1.991*                                 |
| WH 2       | 0.5                                    | 0                          | -0.18  | 1.636 | 0.985 | 1.722                                  |
| Lac        | 19.8                                   | 1                          | -0.22  | 1.992 | 0.94  | 1.936*                                 |
| WH 3       | 0.01                                   | 0                          | -0.28  | 2.357 | 0.958 | 1.730                                  |
| Lac 1      | 20.1                                   | 1                          | -0.27  | 2.307 | 0.991 | 1.910* <sup>A,C,D</sup>                |
| Lac 2      | 20.3                                   | 9                          | -0.26  | 2.2   | 0.997 | 1.828* <sup>A,E</sup>                  |
| WH 3 check | 0.01                                   | 4                          | -0.24  | 2.095 | 0.953 | 1.803 <sup>B,C</sup>                   |
| WH 3 check | 0.01                                   | 11                         | -0.29  | 2.455 | 0.991 | 1.663 <sup>B,D,E</sup>                 |
| WH 4       | 0.07                                   | 0                          | -0.25  | 2.203 | 0.969 | 1.888                                  |
| Lac 1      | 20.1                                   | 1                          | -0.28  | 2.523 | 0.989 | 2.415* <sup>A,B</sup>                  |
| Lac 2      | 17.4                                   | 4                          | -0.26  | 2.305 | 0.983 | 1.995* <sup>A</sup>                    |
| Lac 3      | 26.5                                   | 7                          | -0.32  | 2.745 | 0.989 | 2.032                                  |
| WH 4 check | 0.07                                   | 3                          | -0.23  | 2.033 | 0.968 | 1.923                                  |

The measured concentrations of L-lactate are provided for each of the four batches of whole haemolymph.

The days on which the oxygen equilibrium curves (OECs) were constructed are also specified, where day 0 was the day that the haemolymph was sampled from the crabs and when the whole haemolymph OECs were constructed.

The slope ( $\phi$ ) and y-intercept ( $a$ ) of the regression equations for each set of curves are provided where:  $\log P_{50} = \phi \text{pH} + a$ .

The affinity for O<sub>2</sub> (calculated as  $P_{50}$ ) is supplied for each treatment at the physiological pH of 7.6.

WH, whole haemolymph; Lac, WH enriched with L-lactate.

An asterisk indicates that the haemocyanin O<sub>2</sub>-affinity of the treatment group is different from the haemocyanin O<sub>2</sub>-affinity of WH on the day of sampling (day 0).

A,B,C,D,E, like symbols represent a significant difference in haemocyanin O<sub>2</sub>-affinity between two treatments.

Changes in the L-lactate sensitivity of O<sub>2</sub>-binding by the haemocyanin with ageing of the sample were determined, as were inherent ageing effects in samples WH3 and WH4 several days after sampling (WH3 check, WH4 check).

enriched with L-lactate had a lower haemocyanin O<sub>2</sub>-affinity ( $P_{50}$ =1.82 kPa) than either dialysed haemolymph ( $P_{50}$ =1.26 kPa)

(ANCOVA, elevation:  $P < 0.001$ ) or whole haemolymph ( $P_{50}$ =1.74 kPa; ANCOVA, elevation:  $P < 0.001$ ; Fig. 6A).

Increasing the concentration of urate in dialysed haemolymph reduced the Bohr shift ( $\phi = -0.12$ ) in comparison with that of both dialysed and whole haemolymph (Fig. 6A). The haemocyanin O<sub>2</sub>-affinity in dialysed haemolymph enriched with 4.32 mmol l<sup>-1</sup> urate ( $P_{50}$ =0.87 kPa) was significantly higher than that in dialysed haemolymph ( $P_{50}$ =1.26 kPa) at the physiological pH 7.6 (Fig. 6A). The mean  $n_{50}$  of whole haemolymph ( $n_{50}$ =3.23±0.07,  $N$ =5) was not significantly different from that of dialysed haemolymph (Fig. 6B). However, the O<sub>2</sub>-binding cooperativity of dialysed haemolymph enriched with urate ( $n_{50}$ =2.8±0.19,  $N$ =8) was significantly lower than that of dialysed haemolymph ( $n_{50}$ =3.31±0.06,  $N$ =5).

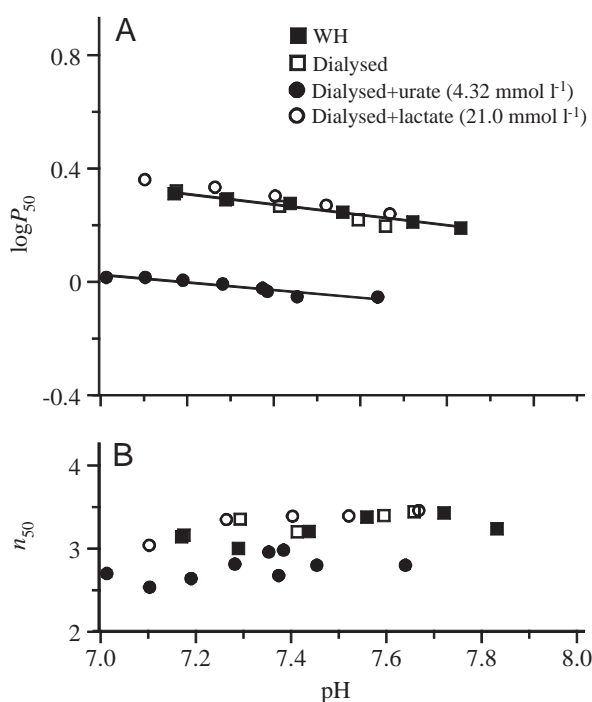

Fig. 6. (A) The effect of dialysis on haemocyanin O<sub>2</sub>-affinity ( $P_{50}$ , measured as kPa) of *Gecarcoidea natalis* and with L-lactate (○) or urate (●) compared with whole haemolymph (WH, filled squares). The regressions describing the relationships between  $\log P_{50}$  and pH are: WH,  $\log P_{50} = 1.636 - 0.184 \text{pH}$  (regression line shown); dialysed haemolymph,  $\log P_{50} = 2.140 - 0.253 \text{pH}$ ; dialysed haemolymph with 4.32 mmol l<sup>-1</sup> urate,  $\log P_{50} = 1.917 - 0.219 \text{pH}$ ; dialysed haemolymph with 21.0 mmol l<sup>-1</sup> L-lactate,  $\log P_{50} = 0.885 - 0.124 \text{pH}$  (regression line shown). (B) Binding cooperativity ( $n_{50}$ ) of the haemocyanin in dialysed haemolymph and in the presence of urate or L-lactate.

## Discussion

### *Functional properties of G. natalis haemocyanin*

In *G. natalis* under resting conditions (pH 7.6 at 25 °C), the affinity of haemocyanin for O<sub>2</sub> ( $P_{50}=1.77$  kPa) and the Bohr shift ( $\phi=-0.26$ ) were comparable with those of other terrestrial crustaceans (Morris, 1991). Attempts to correlate haemocyanin O<sub>2</sub>-affinity with terrestriality have not been very successful. The mean haemocyanin affinities for O<sub>2</sub> at pH 7.6 are not substantially different when aquatic ( $P_{50}=2.21$  kPa), amphibious ( $P_{50}=2.03$  kPa) and terrestrial ( $P_{50}=2.10$  kPa) species (data from Mangum, 1983; Morris, 1991; Truchot, 1992; Morris and Bridges, 1994) are compared, but such comparisons are phylogenetically confounded. Comparison among closely related species, for example within the Grapsidae, do show a progressive increase in haemocyanin O<sub>2</sub>-affinity with increased reliance upon air breathing (Morris and Bridges, 1994). Within the Gecarcinidae, however, the haemocyanin O<sub>2</sub>-affinity of red crabs is similar to that of the closely related *G. lalandi* and *Gecarcinus lateralis* (Morris and Bridges, 1994; Redmond, 1968) but lower than that of *Cardisoma* spp. ( $P_{50}<1$  kPa; Redmond, 1962; Dela-Cruz and Morris, 1997) which, while obligate air-breathers, are still restricted in their distribution to areas with access to open water (e.g. Morris and Adamczewska, 1996).

The affinity of *G. natalis* haemocyanin for O<sub>2</sub> was quite sensitive to temperature changes ( $\Delta H=-59$  kJ mol<sup>-1</sup>), but the tropical habitat of red crabs presents an environment of constant temperature with little selection pressure for the evolution of a haemocyanin of reduced temperature-sensitivity (Burnett *et al.* 1988; Morris, 1991; Eshky *et al.* 1996). The cooperativity of haemocyanin O<sub>2</sub>-binding ( $n_{50}$ ) of 3.2 in *G. natalis* was well within the general range of 2–4 reported for other decapods (Mangum, 1983; Truchot, 1992; Morris *et al.* 1996a) and was not affected by manipulating the concentrations of inorganic ions or by temperature changes. However, high concentrations of urate added to either whole haemolymph in the presence of 21 mmol l<sup>-1</sup> L-lactate or to dialysed haemolymph reduced  $n_{50}$  to 2.6 and 2.8, respectively. Allosteric binding to haemocyanin of modulators of O<sub>2</sub>-affinity can change the binding cooperativity of the respiratory pigment by preferentially affecting either the oxy- or the deoxy-conformation state of the haemocyanin (Zeis *et al.* 1992) or by disrupting the interactions between subunits (Decker *et al.* 1989). Since both urate and L-lactate alter the conformational structure of haemocyanin by binding to the subunits (Johnson *et al.* 1984; Nies *et al.* 1992), simultaneously high concentrations of both these modulating substances may change the cooperativity of O<sub>2</sub>-binding.

A reduction in the O<sub>2</sub>-binding cooperativity in dialysed haemolymph enriched with urate, but not in whole haemolymph enriched with urate, provides evidence for the presence of some dialysable factor in whole haemolymph which stabilised the quaternary structure of the haemocyanin. The presence of dialysable factors in the haemolymph which affect the response of haemocyanin to modulators or to O<sub>2</sub>-

binding have been postulated previously in the terrestrial anomuran *Birgus latro* (Morris *et al.* 1988) and more recently in other species of decapod (Bridges *et al.* 1997; Lallier and Truchot, 1997).

The concentrations of urate measured in the haemolymph of crustaceans range from 0.01 to 0.7 mmol l<sup>-1</sup> (Henry and Cameron, 1981; Lallier *et al.* 1987; Lallier and Truchot, 1989; Dela-Cruz and Morris, 1997; Morris *et al.* 1996b; Morris and Callaghan, 1998). Since the effect of urate on haemocyanin O<sub>2</sub>-affinity in red crabs was relatively small ( $\Delta \log P_{50}/\Delta[\text{urate}]=-0.06$ ) and linearly dependent on the urate concentration, the increase in haemolymph [urate] in *G. natalis* after 20 min of intermittent exercise (0.04 mmol l<sup>-1</sup>; Adamczewska and Morris, 1998) would result in an increase in haemocyanin O<sub>2</sub>-affinity of only 0.05 kPa and have minimal significance in optimising the function of the haemocyanin in O<sub>2</sub> transport *in vivo*.

The sensitivity of decapod crustacean haemocyanins to Ca<sup>2+</sup> ( $\Delta \log P_{50}/\Delta \log[\text{Ca}]$ ) ranges from 0 to -0.82, with terrestrial crustaceans showing a marked reduction in sensitivity (for reviews, see Morris, 1990; Morris and Bridges, 1994). In comparison with other terrestrial crustaceans, the sensitivity of *G. natalis* haemocyanin to Ca<sup>2+</sup> ( $\Delta \log P_{50}/\Delta \log[\text{Ca}]=-0.61$ ) was quite large. During O<sub>2</sub> shortage, Ca<sup>2+</sup> concentrations increase relatively slowly in the haemolymph over a period of hours, but the concentration of L-lactate may increase within minutes (Wood and Randall, 1981; Morris *et al.* 1986b, 1996b; Lallier *et al.* 1987; Lallier and Walsh, 1990). While L-lactate and urate may generally be of reduced utility in land crabs, retaining Ca<sup>2+</sup> as a modulator of haemocyanin O<sub>2</sub>-affinity may be advantageous for air-breathing crabs experiencing chronic acidosis (for a review, see Morris and Bridges, 1994).

### *The importance of L-lactate in determining haemocyanin O<sub>2</sub>-affinity*

The reverse effect of L-lactate, decreasing haemocyanin O<sub>2</sub>-affinity in *G. natalis*, is unique among the Crustacea (Truchot, 1980; Morris *et al.* 1985b; McMahan, 1985; Morris, 1990, 1991; Morris and Bridges, 1994; Truchot, 1992). Additionally, the effect of L-lactate on the haemocyanin O<sub>2</sub>-affinity was not related to the L-lactate concentration but instead to the time that the haemolymph had been stored *in vitro*. As a result of this time-dependent effect, the magnitude of the effect of L-lactate on haemocyanin O<sub>2</sub>-affinity was difficult to determine precisely. However, on the day after the haemolymph had been withdrawn from the animals,  $\Delta \log P_{50}/\Delta \log[\text{lactate}]$  ranged from 0.013 to 0.044, with a mean value of  $0.029 \pm 0.009$  ( $N=3$ ) (Fig. 5A–D; Table 1) but declined to 0.001 thereafter.

The fact that storage of haemolymph *in vitro* resulted in a change in the sensitivity of haemocyanin to L-lactate modulation within 4 days while the haemocyanin O<sub>2</sub>-binding properties of whole haemolymph remained unchanged for up to 11 days (Table 1) suggests that the effect of L-lactate is independent of the fundamental haemocyanin O<sub>2</sub>-binding properties of the haemocyanin in red crabs. Allosteric binding of L-lactate to haemocyanin is quite specific (Graham, 1985)



and results in conformational changes in the haemocyanin that affect the affinity of O<sub>2</sub>-binding by this protein (Johnson *et al.* 1984; Nies *et al.* 1992). The presence of an unstable and dialysable unidentified cofactor in the haemolymph could account for the diminished effect of L-lactate on haemocyanin O<sub>2</sub>-affinity with time. The current data provide further evidence supporting the presence of unknown factors in the haemolymph of crustaceans which affect the O<sub>2</sub>-binding properties of haemocyanin (Morris *et al.* 1985a, 1988; Bridges *et al.* 1997; Lallier and Truchot, 1997).

The 'reverse' lactate effect represents a unique and novel potential adaptation to life on land among the Crustacea. Given that the availability of O<sub>2</sub> in air is more than sufficient to maintain haemocyanin oxygenation at the gas-exchange surfaces in red crabs (Farrelly and Greenaway, 1994; Adamczewska and Morris, 1994a, 1998), the decrease in haemocyanin O<sub>2</sub>-affinity will assist in O<sub>2</sub> unloading at the tissues without compromising loading (for reviews, see McMahon, 1986; Morris, 1990). Fish and aquatic crustaceans possess feedback mechanisms to increase haemoglobin or haemocyanin O<sub>2</sub>-affinity and thereby to maximise O<sub>2</sub> uptake from a relatively O<sub>2</sub>-poor environment (Weber, 1980; Booth *et al.* 1982; Lallier and Truchot, 1989; Morris, 1990; Burnett, 1992). In contrast, the ease of O<sub>2</sub> extraction from air allows mammals to decrease the haemoglobin O<sub>2</sub>-affinity during increased O<sub>2</sub> demand to maximise O<sub>2</sub> delivery to the tissues but still maintain O<sub>2</sub> uptake from air. Like mammals, red crabs appear to possess mechanisms to reduce the affinity of haemocyanin for O<sub>2</sub> during the initial stages of O<sub>2</sub> shortage during exercise to optimise O<sub>2</sub> unloading at the tissues at an unchanged P<sub>O<sub>2</sub></sub>.

The binding sites for L-lactate in crustacean haemocyanin have been estimated at 0.2–0.5 per O<sub>2</sub>-binding site, with a high affinity for L-lactate (Johnson *et al.* 1984; Nies *et al.* 1992). The rate of L-lactate production in red crabs can reach 1.8 mmol l<sup>-1</sup> min<sup>-1</sup> (Adamczewska and Morris, 1994b) and, assuming that the number and affinity of L-lactate binding sites on the haemocyanin of *G. natalis* are similar to those of other species, haemocyanin would become saturated with L-lactate within the first few minutes of exercise. Thus, the increase in L-lactate concentration during an initial period of exercise would assist O<sub>2</sub> off-loading at the tissues by decreasing the O<sub>2</sub>-affinity of haemocyanin; subsequent increases in L-lactate concentration would not reduce haemocyanin O<sub>2</sub>-affinity further and thus would not compromise O<sub>2</sub> loading.

#### Function of haemocyanin in O<sub>2</sub> transport in vivo

To describe the functional role of haemocyanin in *G. natalis*, model OECs were constructed, at the haemolymph pH measured *in vivo* and using the haemocyanin O<sub>2</sub>-binding properties determined *in vitro*, for crabs at rest and for crabs after 20 min of intermittent exercise (Adamczewska and Morris, 1998). Superimposed on the model OECs were the P<sub>O<sub>2</sub></sub> and the concentration of haemocyanin-bound O<sub>2</sub> measured *in vivo* for individual crabs (Adamczewska and Morris, 1998). After 20 min of intermittent exercise, the Bohr shift arising

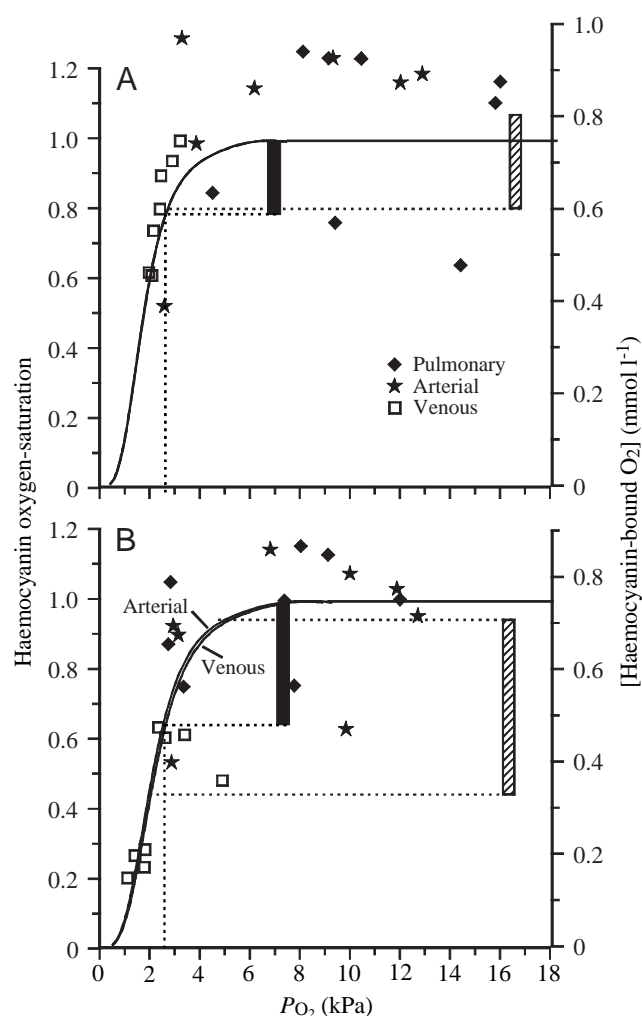

Fig. 7. Oxygen equilibrium curves (saturation given as relative haemocyanin-saturation) simulated for *Gecarcoidea natalis* at rest (A) ( $N=8$ ) or after 20 min of intermittent exercise (B) ( $N=8$ ) based on pH changes *in vivo*. The individual points show the concentration of haemocyanin-bound O<sub>2</sub> determined in pulmonary (◆), arterial (★) and venous (□) haemolymph for the eight crabs in each treatment (data from Adamczewska and Morris, 1998). For clarity, the haemocyanin-bound O<sub>2</sub> values were all normalised to a common haemocyanin content of 0.75 mmol l<sup>-1</sup>. This was achieved by dividing the concentration of haemocyanin-bound O<sub>2</sub> by the maximum concentration of haemocyanin-bound O<sub>2</sub> for that sample (for method and unmodified data, see Adamczewska and Morris, 1998) to obtain relative saturation, which was then multiplied by the value of 0.75 mmol l<sup>-1</sup> so that values could be compared. The hatched bars show the mean arterial-venous difference in normalised haemocyanin-bound O<sub>2</sub> concentration determined *in vivo*, i.e. the actual  $\Delta$ haemocyanin-O<sub>2</sub>. The filled bars show the amount of O<sub>2</sub> released from the haemocyanin as predicted by the *in vitro* data and the *in vivo* P<sub>O<sub>2</sub></sub> changes.

from the haemolymph acidosis predicts a decrease in the O<sub>2</sub>-affinity of haemocyanin (0.43 kPa increase in P<sub>50</sub>) compared with that of the crabs at rest (Fig. 7). This predicted Bohr shift would increase O<sub>2</sub> unloading at the tissues by 70% (Fig. 7,

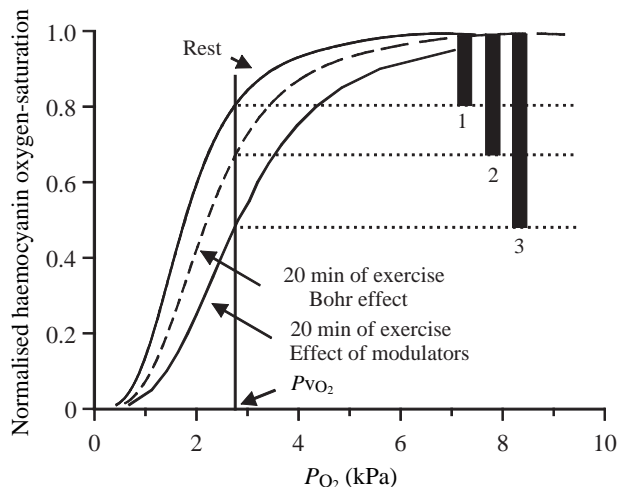

Fig. 8. Oxygen equilibrium curves constructed for the haemolymph of *Gecarcoidea natalis* at rest (1), after 20 min of intermittent exercise based on the Bohr shift only (2) and when the effects of affinity modulators ( $\text{Ca}^{2+}$ , urate and L-lactate) were taken into account (3). The effects of  $\text{Ca}^{2+}$ , urate and L-lactate were assumed to be additive in the model curves. The filled columns associated with each curve show the predicted amount of haemocyanin-bound  $\text{O}_2$  released.  $P_{\text{VO}_2}$ , venous oxygen partial pressure. Normalised haemocyanin oxygen-saturation was calculated as for Fig. 7.

filled bars); however, the *in vivo* data show that the haemocyanin  $\text{O}_2$  delivery to the tissues increased by more than 100% (Fig. 7, hatched bars).

In an attempt to describe the haemocyanin  $\text{O}_2$  functioning *in vivo* more precisely, the modulating effects of  $\text{Ca}^{2+}$ , urate and L-lactate were incorporated into the modelled OEC (Fig. 8). An increase in haemolymph Ca (of  $2 \text{ mmol l}^{-1}$ ) and urate (of  $0.04 \text{ mmol l}^{-1}$ ) concentration after 20 min of intermittent exercise (Adamczewska and Morris, 1998) could theoretically increase the haemocyanin  $\text{O}_2$ -affinity at the  $P_{50}$  by up to 0.14 kPa. However, the increase in L-lactate concentration after exercise would predict a decrease in affinity of approximately 0.3 kPa, thus partially opposing the effect of  $\text{Ca}^{2+}$  and urate and decreasing the haemocyanin  $\text{O}_2$ -affinity at the  $P_{50}$  by 0.17 kPa more than predicted by the Bohr effect alone (Fig. 8).

It is important to note that the effects of modulators on haemocyanin  $\text{O}_2$ -affinity are not necessarily additive (Morris *et al.* 1986a,b, 1987; Zeis *et al.* 1992), and model curves for *in vivo* functioning of haemocyanin in  $\text{O}_2$  transport must be used with caution. However, the *in vitro* modelling of  $\text{O}_2$  transport by haemocyanin in *G. natalis* appeared to approximate closely the data collected *in vivo* regarding  $\text{O}_2$  transport (Adamczewska and Morris, 1998). The unique effect of L-lactate, to decrease the binding of  $\text{O}_2$  by haemocyanin beyond that predicted by the Bohr shift, appeared to be adaptive in red crabs by maximising the delivery of  $\text{O}_2$  to the tissues during exercise. This role for L-lactate is dependent on maintained  $\text{O}_2$  loading and thus the exchange efficiency at the lungs, and these two features must have evolved in concert.

In red crabs, up to 80% of the haemocyanin-bound  $\text{O}_2$  was released to the tissues during exercise; thus, the  $\text{O}_2$  partial pressure and  $\text{O}_2$  reserves in the venous haemolymph were relatively low and did not provide a large  $\text{O}_2$  diffusion gradient into the tissues (Adamczewska and Morris, 1998). During intermittent exercise, red crabs were operating at the limit of the  $\text{O}_2$ -transport system and any additional work would have to be supported by anaerobic metabolism. Whether the  $\text{O}_2$ -binding properties of haemocyanin limit exercise during the migration of red crabs awaits field evaluations of the *in vitro* models generated in the present study.

This work was supported by grants of the Australian Research Council to S.M. and was carried out while A.M.A. was in receipt of an Australian postgraduate award.

## References

- ADAMCZEWSKA, A. M. AND MORRIS, S. (1994a). Exercise in the terrestrial Christmas Island red crab *Gecarcoidea natalis*. I. Blood gas transport. *J. exp. Biol.* **188**, 235–256.
- ADAMCZEWSKA, A. M. AND MORRIS, S. (1994b). Exercise in the terrestrial Christmas Island red crab *Gecarcoidea natalis*. II. Energetics of locomotion. *J. exp. Biol.* **188**, 257–274.
- ADAMCZEWSKA, A. M. AND MORRIS, S. (1998). Strategies for migration in the terrestrial Christmas Island red crab *Gecarcoidea natalis*: intermittent versus continuous locomotion. *J. exp. Biol.* **201**, 3221–3231.
- BOOTH, C. E., MCMAHON, B. R. AND PINDER, A. W. (1982). Oxygen uptake and the potentiating effects of increased hemolymph lactate on oxygen transport during exercise in the blue crab, *Callinectes sapidus*. *J. comp. Physiol.* **148**, 111–121.
- BRIDGES, C. R., HUPPERTS, V., ESCHY, A. A. AND TAYLOR, A. C. (1997). Haemocyanin oxygen transport in *Ocypode* spp.: Modulation of oxygen affinity? *J. mar. biol. Ass. U.K.* **77**, 145–158.
- BRIDGES, C. R. AND MORRIS, S. (1986). Modulation of haemocyanin oxygen affinity by L-lactate: a role for other cofactors. In *Invertebrate Oxygen Carriers* (ed. B. Linzen), pp. 341–352. Berlin: Springer-Verlag.
- BURNETT, L. E. (1992). Integrated function of the respiratory pigment haemocyanin in crabs. *Am. Zool.* **32**, 438–446.
- BURNETT, L. E., SCHONICK, D. A. AND MANGUM, C. P. (1988). Temperature sensitivity of molluscan and arthropod haemocyanins. *Biol. Bull. mar. biol. Lab., Woods Hole* **174**, 153–162.
- CHEN, J. AND CHENG, S. (1993). Studies on haemocyanin and haemolymph protein levels of *Penaes japonicus* based on sex, size and moulting cycle. *Comp. Biochem. Physiol.* **196B**, 293–296.
- DECKER, H., SAVEL-NIEMANN, A., KÖRSCENHAUSEN, D., ECKERSKORN, E. AND MARKL, J. (1989). Allosteric oxygen-binding properties of reassembled tarantula (*Eurypelma californicum*) haemocyanin with incorporated apo- or met-subunits. *Biol. Chem. Hoppe-Seyler* **370**, 511–523.
- DELA-CRUZ, J. AND MORRIS, S. (1997). Respiratory, acid-base and metabolic responses of the Christmas Island blue crab, *Cardisoma hirtipes* (Dana), during simulated environmental conditions. *Physiol. Zool.* **70**, 100–115.
- ESHKY, A. A., TAYLOR, A. C. AND ATKINSON, R. J. A. (1996). The effects of temperature on aspects of respiratory physiology of the semi-terrestrial crabs, *Uca inversa* (Hoffmann) and *Metopograpsus*

- messor* (Forsk.) from the red sea. *Comp. Biochem. Physiol.* **114B**, 297–304.
- FARRELLY, C. A. AND GREENAWAY, P. (1994). Gas exchange through the lungs and gills in air-breathing crabs. *J. exp. Biol.* **187**, 113–130.
- GRAHAM, R. A. (1985). A model for L-lactate binding to *Cancer magister* hemocyanin. *Comp. Biochem. Physiol.* **81B**, 885–887.
- GREENAWAY, P., MORRIS, S. AND MCMAHON, B. R. (1988). Adaptations to a terrestrial existence by the robber crab *Birgus latro*. II. *In vivo* respiratory gas exchange and transport. *J. exp. Biol.* **140**, 493–509.
- HENRY, R. P. AND CAMERON, J. N. (1981). A survey of blood and tissue nitrogen compounds in terrestrial decapods of Palau. *J. exp. Zool.* **218**, 83–88.
- HERREID, C. F. AND FULL, R. J. (1988). Energetics and locomotion. In *Biology of the Land Crabs* (ed. W. W. Burggren and B. R. McMahon), pp. 333–377. New York: Cambridge University Press.
- JOHNSON, B. A., BONAVENTURA, C. AND BONAVENTURA, J. (1984). Allosteric modulation of *Callinectes sapidus* hemocyanin by binding of L-lactate. *Biochemistry* **23**, 872–878.
- JOKUMSEN, A. AND WEBER, R. E. (1982). Hemocyanin oxygen affinity in hermit crab blood is temperature independent. *J. exp. Zool.* **221**, 389–394.
- LALLIER, F., BOITEL, F. AND TRUCHOT, J. P. (1987). The effect of ambient oxygen and temperature on haemolymph L-lactate and urate concentrations in the shore crab, *Carcinus maenas*. *Comp. Biochem. Physiol.* **86A**, 255–260.
- LALLIER, F. AND TRUCHOT, J. P. (1989). Hemolymph oxygen transport during environmental hypoxia in the shore crab, *Carcinus maenas*. *Respir. Physiol.* **77**, 323–336.
- LALLIER, F. H. AND TRUCHOT, J. P. (1997). Hemocyanin oxygen-binding properties of a deep-sea hydrothermal vent shrimp – evidence for a novel cofactor. *J. exp. Zool.* **277**, 357–364.
- LALLIER, F. H. AND WALSH, P. J. (1990). Urate does not accumulate in the haemolymph of exercised blue crabs, *Callinectes sapidus*. *J. exp. Biol.* **154**, 581–585.
- MANGUM, C. P. (1983). Oxygen transport in blood. In *The Biology of Crustacea*, vol. 5, *Internal Anatomy and Physiological Regulation* (ed. D. Bliss), pp. 373–430. New York: Academic Press.
- MCMAHON, B. R. (1985). Function and functioning of crustacean hemocyanin. In *Respiratory Pigments in Animals* (ed. J. Lamy, J.-P. Truchot and R. Gilles), pp. 33–58. Berlin: Springer-Verlag.
- MCMAHON, B. R. (1986). Oxygen binding by hemocyanin: Compensation during activity and environmental change. In *Invertebrate Oxygen Carriers* (ed. B. Linzen), pp. 299–319. Berlin: Springer-Verlag.
- MCMAHON, B. R., McDONALD, D. G. AND WOOD, C. M. (1979). Ventilation, oxygen uptake and haemolymph oxygen transport, following enforced exhausting activity in the Dungeness crab *Cancer magister*. *J. exp. Biol.* **80**, 271–285.
- MCMAHON, B. R. AND MORRIS, S. (1990). Neurohormonal and metabolic effects on oxygen binding by crustacean hemocyanin. In *Invertebrate Dioxigen Carriers* (ed. G. Préaux and R. Lontie), pp. 461–465. Leuven: Leuven University Press.
- MORRIS, S. (1990). Organic ions as modulators of respiratory pigment function during stress. *Physiol. Zool.* **63**, 253–287.
- MORRIS, S. (1991). Respiratory gas exchange and transport in crustaceans: Ecological determinants. *Mem. Queensland Mus.* **31**, 241–261.
- MORRIS, S. AND ADAMCZEWSKA, A. M. (1996). Christmas Island red crabs and town development. A consultancy project for the ANCA (Project DN44).
- MORRIS, S. AND BRIDGES, C. R. (1994). Properties of respiratory pigments in bimodal breathing animals: Air and water breathing by fish and crustaceans. *Am. Zool.* **34**, 216–228.
- MORRIS, S., BRIDGES, C. R. AND GREISHABER, M. K. (1985a). A new role for uric acid: modulation of hemocyanin oxygen affinity in crustaceans. *J. exp. Zool.* **235**, 135–139.
- MORRIS, S., BRIDGES, C. R. AND GRIESHABER, M. K. (1987). The regulation of haemocyanin oxygen affinity during emersion of the crayfish *Austropotamobius pallipes*. III. The dependence of Ca<sup>2+</sup>-haemocyanin binding on the concentration of L-lactate. *J. exp. Biol.* **133**, 339–352.
- MORRIS, S. AND CALLAGHAN, J. (1998). Respiratory and metabolic responses of the Australian yabby *Cherax destructor* to progressive and sustained environmental hypoxia. *J. comp. Physiol.* **168**, 377–388.
- MORRIS, S., GREENAWAY, P. AND MCMAHON, B. R. (1988). Adaptations to a terrestrial existence by the robber crab, *Birgus latro* L. I. An *in vitro* investigation of haemolymph gas transport. *J. exp. Biol.* **140**, 477–491.
- MORRIS, S., GREENAWAY, P. AND MCMAHON, B. R. (1996a). Air breathing by the purple shore crab, *Hemigrapsus nudus* (Dana). III. Haemocyanin function in respiratory gas transport. *Physiol. Zool.* **69**, 839–863.
- MORRIS, S., GREENAWAY, P. AND MCMAHON, B. R. (1996b). Air breathing by the purple shore crab, *Hemigrapsus nudus* (Dana). IV. Aquatic hypoxia as an impetus for emersion? Oxygen uptake, respiratory gas transport and acid–base state. *Physiol. Zool.* **69**, 864–886.
- MORRIS, S. AND MCMAHON, B. R. (1989). Potentiation of hemocyanin oxygen affinity by catecholamines in the crab *Cancer magister*: a specific effect of dopamine. *Physiol. Zool.* **62**, 654–667.
- MORRIS, S., TAYLOR, A. C., BRIDGES, C. R. AND GRIESHABER, M. K. (1985b). Respiratory properties of the haemolymph of the intertidal prawn *Palaemon elegans* (Rathke). *J. exp. Zool.* **233**, 175–186.
- MORRIS, S., TYLER-JONES, R., BRIDGES, C. R. AND TAYLOR, E. W. (1986a). The regulation of haemocyanin oxygen affinity during emersion of the crayfish *Austropotamobius pallipes*. II. An investigation of *in vivo* changes in oxygen affinity. *J. exp. Biol.* **121**, 327–337.
- MORRIS, S., TYLER-JONES, R. AND TAYLOR, E. W. (1986b). The regulation of haemocyanin oxygen affinity during emersion of the crayfish *Austropotamobius pallipes*. I. An *in vitro* investigation of the interactive effects of calcium and L-lactate on oxygen affinity. *J. exp. Biol.* **121**, 315–326.
- NIES, A., ZEIS, B., BRIDGES, C. R. AND GRIESHABER, M. K. (1992). Allosteric modulation of haemocyanin oxygen-affinity by L-lactate and urate in the lobster *Homarus americanus*. II. Characterization of specific effector binding sites. *J. exp. Biol.* **168**, 111–124.
- REDMOND, J. R. (1962). Oxygen–hemocyanin relationships in the land crab, *Cardisoma guanhumi*. *Biol. Bull.* **122**, 252–262.
- REDMOND, J. R. (1968). Transport of oxygen by the blood of the land crab *Gecarcinus lateralis*. *Am. Zool.* **8**, 471–479.
- SICK, H. AND GERSONDE, K. (1969). Method for continuous registration of O<sub>2</sub>-binding curves of hemoproteins by means of a diffusion chamber. *Analyt. Biochem.* **32**, 362–376.
- TRUCHOT, J.-P. (1980). Lactate increases the oxygen affinity of crab hemocyanin. *J. exp. Zool.* **214**, 205–208.
- TRUCHOT, J.-P. (1992). Respiratory function of arthropod

- hemocyanins. In *Advances in Comparative and Environmental Physiology*, vol. 13, *Blood and Tissue Oxygen Carriers* (ed. C. P. Mangum), pp. 377–410. Berlin: Springer-Verlag.
- WEBER, R. E. (1980). Functions of invertebrate hemoglobins with special reference to adaptations to environmental hypoxia. *Am. Zool.* **20**, 79–101.
- WOOD, C. M. AND RANDALL, D. J. (1981). Oxygen and carbon dioxide exchange during exercise in the land crab *Cardisoma carnifex*. *J. exp. Zool.* **218**, 7–22.
- ZEIS, B., NIES, A., BRIDGES, C. R. AND GRIESHABER, M. K. (1992). Allosteric modulation of haemocyanin oxygen-affinity by L-lactate and urate in the lobster *Homarus americanus*. I. Specific and additive effects on haemocyanin oxygen-affinity. *J. exp. Biol.* **168**, 93–110.
